# Supplementary material
Source: Springer Nature journal article supplement (https://www.springermedizin.de/resource/supplementary/12958_2009_621_MOESM5_ESM.pdf/9568112)

# GR

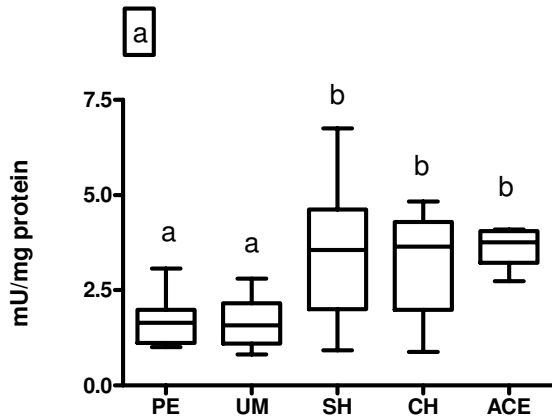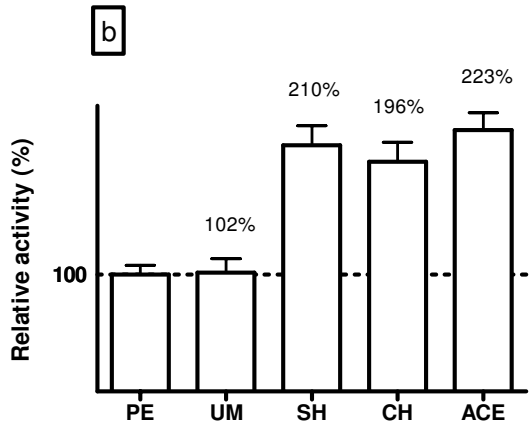

Supplement: MOESM5 [file 9568112]
